# Supplementary material for: Evaluating Machine Learning–Based Automated Personalized Daily Step Goals Delivered Through a Mobile Phone App: Randomized Controlled Trial
Source: PubMed Central journal article supplement (PMC5806006; doi:10.2196/mhealth.9117), 2018-01-25
Supplement: mhealth_v6i1e28_app1.pdf [file mhealth_v6i1e28_app1.pdf]

### Appendix 1

Table A1. Self-reported physical activity scores and barriers to being active of the two groups pre and post the study.

| Variable                                                       | Range of possible scores            | Control (M±SD) | Intervention (M±SD) | P    | Overall P |
|----------------------------------------------------------------|-------------------------------------|----------------|---------------------|------|-----------|
| <b>IPAQ Questionnaire</b>                                      |                                     |                |                     |      |           |
| <b>Satisfied with physical activity level in the past week</b> | 0-10 (10 being most, 0 being least) |                |                     |      | 0.69      |
| <b>Run-in</b>                                                  |                                     | 5.0±2.3        | 5.1±2.6             | 0.92 |           |
| <b>10-week</b>                                                 |                                     | 5.8±2.7        | 5.3±2.6             | 0.45 |           |
| <b>Regular exercise routine</b>                                | 0-10                                |                |                     |      | 0.17      |
| <b>Run-in</b>                                                  |                                     | 5.4±2.9        | 4.7±3.5             | 0.38 |           |
| <b>10-week</b>                                                 |                                     | 5.9±3.3        | 4.5±3.4             | 0.10 |           |
| <b>Satisfied with health status</b>                            | 0-10                                |                |                     |      | 0.97      |
| <b>Run-in</b>                                                  |                                     | 6.8±2.0        | 7.0±1.8             | 0.65 |           |
| <b>10-week</b>                                                 |                                     | 6.9±2.2        | 6.6±2.4             | 0.63 |           |
| <b>Number of days doing vigorous PA</b>                        |                                     |                |                     |      | 0.88      |
| <b>Run-in</b>                                                  |                                     | 1.7±1.2        | 2.2±1.6             | 0.16 |           |
| <b>10-week</b>                                                 |                                     | 2.0±1.8        | 1.7±1.7             | 0.48 |           |
| <b>Minutes per day doing vigorous PA</b>                       |                                     |                |                     |      | 0.52      |
| <b>Run-in</b>                                                  |                                     | 60.2±61.3      | 49.8±32.9           | 0.43 |           |
| <b>10-week</b>                                                 |                                     | 43.8±48.8      | 37.2±36.4           | 0.55 |           |
| <b>Number of days doing moderate PA</b>                        |                                     |                |                     |      | 0.23      |
| <b>Run-in</b>                                                  |                                     | 3.2±2.1        | 3.1±2.1             | 0.75 |           |
| <b>10-week</b>                                                 |                                     | 3.0±2.4        | 2.2±2.2             | 0.16 |           |
| <b>Minutes per day doing moderate PA</b>                       |                                     |                |                     |      | 0.18      |
| <b>Run-in</b>                                                  |                                     | 44.8±42.6      | 58.0±61.5           | 0.35 |           |
| <b>10-week</b>                                                 |                                     | 42.9±39.4      | 58.2±81.9           | 0.36 |           |
| <b>Number of days walking</b>                                  |                                     |                |                     |      | 0.52      |
| <b>Run-in</b>                                                  |                                     | 5.7±1.6        | 5.7±1.9             | 0.98 |           |
| <b>10-week</b>                                                 |                                     | 6.1±1.33       | 5.7±2.0             | 0.28 |           |
| <b>Minutes per day walking</b>                                 |                                     |                |                     |      | 0.41      |
| <b>Run-in</b>                                                  |                                     | 43.1±32.1      | 42.9±34.9           | 0.99 |           |
| <b>10-week</b>                                                 |                                     | 54.6±49.4      | 57.1±61.2           | 0.86 |           |
| <b>Hours per day sitting</b>                                   |                                     |                |                     |      | 0.32      |
| <b>Run-in</b>                                                  |                                     | 8.8±4.7        | 9.4±5.6             | 0.66 |           |
| <b>10-week</b>                                                 |                                     | 7.7±2.5        | 9.4±9.5             | 0.34 |           |

|                                 |                                 |          |           |             |      |
|---------------------------------|---------------------------------|----------|-----------|-------------|------|
| <b>Barriers to Being Active</b> |                                 |          |           |             | 0.41 |
| <b>Total score</b>              | 0-63(63 being greatest barrier) |          |           |             |      |
| <b>Run-in</b>                   |                                 | 19.1±8.7 | 20.9±10.3 | 0.45        |      |
| <b>10-week</b>                  |                                 | 18.1±9.5 | 20.3±10.6 | 0.39        |      |
| <b>Lack of time</b>             | 0-9                             |          |           |             | 0.51 |
| <b>Run-in</b>                   |                                 | 4.1±2.2  | 4.3±2.7   | 0.71        |      |
| <b>10-week</b>                  |                                 | 4.2±2.5  | 4.0±2.8   | 0.83        |      |
| <b>Social influence</b>         | 0-9                             |          |           |             | 0.55 |
| <b>Run-in</b>                   |                                 | 2.4±1.6  | 2.9±2.2   | 0.34        |      |
| <b>10-week</b>                  |                                 | 2.2±1.6  | 2.6±2.0   | 0.39        |      |
| <b>Lack of energy</b>           | 0-9                             |          |           |             | 0.24 |
| <b>Run-in</b>                   |                                 | 4.5±2.1  | 4.7±2.4   | 0.73        |      |
| <b>10-week</b>                  |                                 | 4.3±2.3  | 4.4±2.4   | 0.91        |      |
| <b>Lack of willpower</b>        | 0-9                             |          |           |             | 0.99 |
| <b>Run-in</b>                   |                                 | 4.3±2.6  | 4.4±2.7   | 0.93        |      |
| <b>10-week</b>                  |                                 | 3.7±2.3  | 4.8±2.9   | 0.11        |      |
| <b>Fear of injury</b>           | 0-9                             |          |           |             | 0.74 |
| <b>Run-in</b>                   |                                 | 0.7±1.2  | 0.6±0.9   | 0.74        |      |
| <b>10-week</b>                  |                                 | 0.7±1.3  | 0.6±1.1   | 0.85        |      |
| <b>Lack of skill</b>            | 0-9                             |          |           |             | 0.40 |
| <b>Run-in</b>                   |                                 | 1.3±1.8  | 1.2±1.6   | 0.96        |      |
| <b>10-week</b>                  |                                 | 0.9±1.2  | 1.1±1.4   | 0.49        |      |
| <b>Lack of resources</b>        | 0-9                             |          |           |             | 0.35 |
| <b>Run-in</b>                   |                                 | 1.9±1.7  | 2.8±1.6   | <b>0.03</b> |      |
| <b>10-week</b>                  |                                 | 2.2±1.8  | 2.8±1.6   | 0.17        |      |
